1 **An impressive capacity for cold tolerance plasticity protects against**  
2 **ionoregulatory collapse in the disease vector, *Aedes aegypti***

3

4 Amanda Jass<sup>1</sup>, Gil Y. Yerushalmi<sup>1</sup>, Hannah E. Davis<sup>2</sup>, Andrew Donini<sup>1</sup>, and Heath A.  
5 MacMillan<sup>2</sup>

6

7 1. Department of Biology, York University, Toronto, Canada, M3J 1P3

8 2. Department of Biology, Carleton University, Ottawa, Canada, K1S 5B6

9

10

11 **Keywords:** Chill tolerance; disease vector; hyperkalemia; ion balance; phenotypic plasticity;  
12 thermal performance

13 **Abstract**

14  
15  
16  
17  
18  
19  
20  
21  
22  
23  
24  
25  
26  
27  
28  
29  
30  
31  
32  
33  
34  
35  
36  
37  
38

1. The mosquito *Aedes aegypti* is largely confined to tropical and subtropical regions but its range has recently been spreading to colder climates. As insect biogeography is closely tied to environmental temperature, understanding the limits of *Ae. aegypti* thermal tolerance and their capacity for phenotypic plasticity is important in predicting the spread of this species.
2. In this study we report on the chill coma onset and recovery, as well as low temperature survival phenotypes of larvae and adults of *Aedes aegypti* that developed or were acclimated to 15°C (cold) or 25°C (warm).
3. Developmental cold acclimation did not affect chill coma onset of larvae but substantially reduced chill coma onset temperatures in adults. Chill coma recovery time was affected by both temperature and the duration of exposure, and developmental and adult acclimation both strongly mitigated these effects and increased rates of survival following prolonged chilling.
4. Female adults were far less likely to take a blood meal when cold acclimated and simply exposing females to blood (without feeding) attenuated some of the beneficial effects of cold acclimation on chill coma recovery time.
5. Lastly, larvae suffered from hemolymph hyperkalemia when chilled, but development in the cold attenuated the imbalance, which suggests that acclimation can prevent cold-induced ionoregulatory collapse in this species.
6. Our results demonstrate that *Aedes aegypti* larvae and adults have the capacity to acclimate to cold temperatures and do so at least in part by better maintaining ion balance in the cold. This ability for cold acclimation may facilitate the spread of this species to higher latitudes, particularly in an era of climate change.

## 39 Introduction

40 The mosquito *Aedes aegypti* is abundant in tropical and subtropical regions where it is an  
41 arboviral disease vector for Zika, Chikungunya, yellow fever, and dengue (Bhatt et al., 2013;  
42 Kraemer et al., 2019, 2015). The global distribution of *Ae. aegypti* is closely related to  
43 environmental temperatures (Brady et al., 2014, 2013; Kraemer et al., 2019). This pattern  
44 suggests that like other small dipterans such as *Drosophila*, the inability of *Aedes* to survive cold  
45 winters in poleward latitudes limits its ability to colonize these areas (J. L. Andersen et al., 2015;  
46 Kellermann et al., 2012; Overgaard, Kearney, & Hoffmann, 2014).

47 In recent years, however, *Ae. aegypti*, and the closely-related vector *Ae. albopictus*, have spread  
48 through the northeastern United States. Adults of both species have even begun to appear in  
49 southern Ontario, Canada early in spring (mosquito responsible for majority of Zika infections  
50 found in Canada for the first time, 2017), which suggests successful local overwintering of at  
51 least some adults or late-stage pupae. The ability to overwinter in northern climates is completely  
52 at odds with our understanding of *Ae. aegypti* as a cold-intolerant species with little to no ability  
53 for seasonal quiescence or diapause (Diniz, Albuquerque, Oliva, Melo-santos, & Ayres, 2017).  
54 Current climate models predict continued increases in average global temperatures and a greater  
55 frequency of extreme thermal events during winter (Easterling et al., 2000; Williams, Henry, &  
56 Sinclair, 2014), but predictive models of *Ae. aegypti* distribution do not currently consider the  
57 possibility of phenotypic plasticity in this species (e.g. Kamal et al., 2018), because no such  
58 plasticity has been described.

59 Because of their global importance as disease vectors and their demonstrated potential for  
60 invasion, there is growing interest in understanding the limits of mosquito thermal tolerance.

61 Low temperatures adversely affect life history traits throughout the *Ae. aegypti* life cycle,  
62 including development rate, reproductive success, and survival (Carrington, Armijos,  
63 Lambrechts, Barker, & Scott, 2013; Davis, 1931; Yang, Macoris, Galvani, Andrighetti, &  
64 Wanderly, 2009). The effects of temperature on *Ae. aegypti* developmental success appear quite  
65 pronounced, as survival from egg to adult drops from 92% at 20°C to only 3% at 15°C (Rueda,  
66 Patel, Axtell, & Stinner, 1990). Of the different life stages of *Ae. aegypti*, the eggs appear  
67 tolerant to cold, surviving and hatching following cold exposures up to 24 h at -2°C or 1 h at -  
68 17°C (Davis, 1931; Thomas, Obermayr, Fischer, Kreyling, & Beierkuhnlein, 2012).  
69 Accordingly, *Ae. aegypti* have been documented to successfully overwinter as far north as  
70 Washington D.C. and Indiana, and as far south as Buenos Aires, and there is evidence of cold  
71 adaptation occurring in these temperate populations (De Majo, Montini, & Fischer, 2017;  
72 Fischer, Alem, De Majo, Campos, & Schweigmann, 2011; Hawley, Pumpuni, Brady, & Craig,  
73 1989; Lima, Lovin, Hickner, & Severson, 2016). Like many other poikilotherms, larval *Ae.*  
74 *aegypti* experience slowed development, delayed and decreased pupation, and increased  
75 mortality with decreasing temperatures (Brady et al., 2014; Carrington et al., 2013; De Majo et  
76 al., 2017; Tun-Lin, Burkot, & Kay, 2000; Yang et al., 2009). Similarly, adult *Ae. aegypti*  
77 experience increased mortality, decreased oviposition rate, and overall reduced fecundity at 15°C  
78 (Tun-Lin et al., 2000). To date, however, studies of temperature effects on *Ae. aegypti* have  
79 largely focused on consequences to reproductive success, growth and development, and there has  
80 been little work focused on the extreme limits of thermal tolerance or the potential for thermal  
81 plasticity, particularly in later life stages. This gap in knowledge represents a considerable risk,  
82 particularly considering recent reports from *Drosophila* that thermal limits may better predict

83 species distribution and abundance than optimal temperatures or rates of growth and  
84 reproduction at more favourable temperatures (MacLean et al., 2019; Overgaard et al., 2014).

85 *Ae. aegypti* is a chill susceptible insect, meaning it succumbs from exposure to low temperatures  
86 well above the freezing of its bodily fluids. The cold tolerance of chill susceptible insects can  
87 vary widely, both among and within species. Broad differences in basal cold tolerance can exist  
88 among populations or species (Gibert, Moreteau, Pétavy, Karan, & David, 2001; Kellermann et  
89 al., 2012; Vorhees, Gray, & Bradley, 2013; Warren & Chick, 2013), and many insects can also  
90 drastically alter their cold tolerance within their lifetime. For example, insects can undergo  
91 thermal acclimation in response to chronic low temperature exposure, or rapidly harden in  
92 response to an acute temperature change (e.g. rapid cold-hardening) (Colinet & Hoffmann, 2012;  
93 Hoffmann, Scott, Partridge, & Hallas, 2003; Kellermann et al., 2012; Kelty & Lee, 2001;  
94 Sinclair et al., 2006). To date, a capacity for thermal plasticity at low temperature (cold  
95 acclimation) has been demonstrated in many chill-susceptible insects, such as fruit flies,  
96 cockroaches, locusts, and crickets (M. K. Andersen, Folkersen, MacMillan, & Overgaard, 2017;  
97 Coello Alvarado, MacMillan, & Sinclair, 2015; Colinet & Hoffmann, 2012; V Košťál,  
98 Yanagimoto, & Bastl, 2006).

99 Cold acclimation typically affects a variety of cold tolerance phenotypes in chill susceptible  
100 insects. For example, cold-acclimated insects commonly have a lower temperature of chill coma  
101 onset (CCO), more rapidly recover from chill coma following rewarming (a lower chill coma  
102 recovery time; CCRT), and avoid the development of cold-induced injury better than warm-  
103 acclimated conspecifics (Coello Alvarado et al., 2015; MacMillan, Andersen, Loeschcke, &  
104 Overgaard, 2015; Ransberry, MacMillan, & Sinclair, 2011). While little is known about cold

105 acclimation in *Ae. aegypti*, eggs of *Ae. albopictus* have increased cold tolerance following cold  
106 acclimation (Hanson & Craig, 1995). The magnitude of cold plasticity can vary among and  
107 within populations (Nyamukondiwa, Terblanche, Marshall, & Sinclair, 2011; Sørensen,  
108 Kristensen, & Overgaard, 2016). In the case of *Ae. albopictus*, cold acclimation was only noted  
109 in temperate populations and not tropical populations, so this capacity for plasticity is thought to  
110 be facilitating the northward expansion of the species' range (Hanson & Craig, 1995; Rochlin,  
111 Ninivaggi, Hutchinson, & Farajollahi, 2013; Romi, Severlini, & Toma, 2006).

112 While tolerance to extreme cold relies on a physiological capacity to avoid or survive ice  
113 formation inside the body, tolerance to chilling requires a physiological capacity to resist the  
114 effects of low temperature *per se* on organ, tissue, and cellular biochemistry (MacMillan, 2019;  
115 Overgaard & MacMillan, 2017; Teets & Denlinger, 2013). Consequently, measures of cold  
116 tolerance relevant to freeze avoidant and freeze tolerant insects, such as the supercooling point  
117 (the temperature of spontaneous ice formation within the body) or survival following freezing,  
118 are irrelevant to characterizing the thermal limits of chill susceptible insects (Overgaard &  
119 MacMillan, 2017). When cooled below a critical threshold temperature, chill susceptible insects  
120 suffer a local loss of ion homeostasis in the nervous system, leading to nerve depolarization  
121 (spreading depression) and a state of complete neuromuscular silence termed chill coma  
122 (MacMillan & Sinclair, 2011a; Mellanby, 1939; Robertson, Spong, & Srithiphaphirom, 2017).  
123 The temperature at which this paralytic state occurs is called the chill coma onset temperature  
124 (CCO) (Overgaard & MacMillan, 2017). With time spent at low temperatures, chill susceptible  
125 insects lose ion and water balance and suffer from hemolymph hyperkalemia (high  $[K^+]$ ), which  
126 further depolarizes cells and activates voltage-gated calcium channels, driving rampant cellular  
127 apoptosis (Bayley et al., 2018; MacMillan, Andersen, Davies, & Overgaard, 2015; MacMillan,

128 Baatrup, & Overgaard, 2015). The severity of this loss of homeostasis increases with longer or  
129 lower temperature exposures, and the tissue damage that accrues while an insect is in this state is  
130 thought to largely determine its survival and fitness following rewarming (Overgaard &  
131 MacMillan, 2017). Species that are more cold tolerant, or individuals that have acclimated to low  
132 temperatures are better able to maintain ion and water balance during cold exposure (M. K.  
133 Andersen, Folkersen, et al., 2017; Coello Alvarado et al., 2015; V Košťál et al., 2006;  
134 MacMillan, Andersen, Loeschcke, et al., 2015).

135 Here, we use a laboratory-bred population of *Ae. aegypti* to determine chill coma onset and  
136 recovery phenotypes of larvae and adults of this species. We allowed larval and adult mosquitoes  
137 to undergo either warm (25°C) or cold acclimation (15°C) to test whether this species is capable  
138 of acclimating to sub-optimal thermal conditions. Cold acclimation led to significant changes in  
139 the cold tolerance of both larvae and adults, so we used larvae to test whether improvements in  
140 cold tolerance following cold acclimation are driven by an improved ability to maintain ion  
141 balance in the cold.

## 142 **Materials and Methods**

### 143 *Animal husbandry*

144 A colony of *Aedes aegypti* mosquitoes (Linnaeus) was established in 2007 at York University  
145 from eggs provided by M. Patrick (San Diego) and supplemented with eggs from Liverpool  
146 strain provided by C. Lowenberger (Simon Fraser, BC., Canada). Our mosquitoes were reared as  
147 described by Misyura et al. (2017) with slight modifications. Briefly, eggs were hatched in 2 L of  
148 dechlorinated tap water (water changed every 4 d) and fed 6 mL of a premade food solution  
149 composed of 1.8 g liver powder and 1.8 g of inactive yeast in 500 mL of reverse-osmosis water

150 daily. The population is maintained at room temperature ( $22\pm 1^\circ\text{C}$ ) with a 12:12 h light:dark  
151 cycle.

152 To obtain larvae for experiments, eggs were added to 1.5 L of dechlorinated tap water along with  
153 2 mL of the liver-yeast diet. Containers of water and eggs were kept in a  $25 \pm 0.5^\circ\text{C}$  incubator  
154 (12 h:12 h light:dark). The next day, hatching was confirmed through visual inspection and 2 mL  
155 of food was added. One day later, all larvae in each bin were randomly assigned to one of two  
156 developmental acclimation treatments,  $15^\circ\text{C}$  or  $25^\circ\text{C}$ , such that each treatment had  
157 approximately equal numbers. The larvae assigned to each treatment were transferred to a new  
158 container filled with 1.5 L dechlorinated tap water and 2 mL food and placed in either the  $15^\circ\text{C}$   
159 or the  $25^\circ\text{C}$  incubator. Larvae were fed 2 mL liver-yeast food mix every day until the first pupa  
160 was spotted. Water was changed as needed, with food always added after a water change. When  
161 the first pupae were observed, 4<sup>th</sup> instar larvae were collected to be used in experiments.

162 To acclimate adults for experiments, pupae (reared under standard colony conditions as  
163 described above) were isolated daily and given 1-2 days to mature prior to the placement of  $40 \pm$   
164 10 pupae in small open-top containers with  $\sim 60$  mL of dechlorinated tap water. The open-top  
165 containers were then placed within custom made (18 cm long x 15 cm wide x 10 cm tall)  
166 enclosed containers (with a netted section to allow for air flow) allowing the pupae to emerge  
167 over a period of 48 h. A premade sugar water solution (40 g of sucrose in 250 mL of tap water)  
168 was placed in each container to allow for adults to feed. Following 48 h given for emergence,  
169 any remaining pupae were removed, and the containers were separated into two different  
170 acclimation treatments: cold-acclimation ( $15^\circ\text{C}$ ) and warm-acclimation ( $25^\circ\text{C}$ ). This ensured all  
171 adults were 1-2 days old upon the initiation of the acclimation treatments. Both acclimation



172 groups were maintained on a 12:12 h light:dark cycle. Adult mosquitoes were left at their  
173 respective acclimation temperatures for five days, and thus all adults were 6-7 days post-  
174 emergence when used in experiments.

#### 175 *Chill coma onset*

176 To assess chill coma onset temperatures (CCO), individual larvae were collected from the  
177 developmental acclimation treatments using a pipette and transferred to 4 mL glass vials along  
178 with 2 mL of their rearing water. The vials were affixed to a custom-made aluminum rack that  
179 was submerged in a glass aquarium containing a 1:1 mixture of ethylene glycol and water, which  
180 was circulated by a programmable refrigerated bath (Model AP28R-30, VWR International,  
181 Mississauga, ON, Canada). The temperature of the bath was independently monitored with a pair  
182 of type-K thermocouples connected to a computer running Picolog (version 5.25.3) via a Pico  
183 TC-07 interface (Pico Technology, St. Neots, UK). The larvae were held at 20°C for 15 min then  
184 ramped down at 0.1°C/min. We recorded the temperature at which each larva completely  
185 stopped responding to vibrational and light stimuli. Since larvae would often ignore a stimulus  
186 during one scan only to respond strongly on the next, all larvae, including those that had been  
187 recorded as being in chill coma, were tested for a response throughout the experiment to ensure  
188 the accuracy of the CCO temperature.

189 Adult mosquitoes from the 25°C and 15°C acclimation groups were briefly anesthetized under  
190 CO<sub>2</sub> and placed in 4 mL glass vials (filled with ambient air) and affixed to a rack that was  
191 submerged in a temperature-controlled bath, as described above for the larvae. To record adult  
192 CCO, the temperature of the bath was initially set to 25°C for 15 min and then ramped down at a  
193 rate of 0.13°C min<sup>-1</sup> while mosquito movement was continuously monitored. The temperature at

194 which movement stopped following perturbation with a plastic probe was recorded as the adult  
195 mosquito CCO.

### 196 *Chill coma recovery time (CCRT)*

197 To measure chill coma recovery time (CCRT), larvae were exposed to 2°C for 4, 8, 12, or 16  
198 hours. Larvae were cold-exposed by transferring each individual to a 1.5 mL open centrifuge  
199 tube and incubating the tubes in a refrigerated centrifuge (Thermo Scientific™ Sorvall  
200 Legend™ Micro 21R) set to 2°C (temperature was confirmed via independent thermocouples,  
201 and chosen based on prior trials). After exposure to the cold, each larva was transferred to its  
202 own 6.7cm diameter plastic container, filled with 50 mL room temperature dechlorinated water.  
203 A timer was set immediately upon placement of the larva into room temperature water. CCRT  
204 was assessed as the time taken for the larva to swim a continuous distance of 2 cm (measured  
205 using a 1 cm<sup>2</sup> grid lining the bottom of the container). Larvae that could not swim 2 cm within 2  
206 h were considered to have suffered severe injury.

207 Chill coma recovery time (CCRT) was determined in adult mosquitoes following 6 h at 2°C.  
208 Mosquitoes were sexed and placed in 4 mL enclosed glass containers at room temperature  
209 (22±1°C) and observed for 120 minutes. The duration of time required for a mosquito to stand on  
210 all 6 legs following its removal from the cold was recorded as its CCRT. To assess the effect of  
211 blood feeding on CCRT, sugar-water mixture was removed from the cages of warm-acclimated  
212 mosquitoes 24 h before blood feeding. Mosquitoes were exposed to warm sheep blood for 20  
213 min through a thinly stretched parafilm membrane. The mosquitoes were then either given a 0,  
214 40, or 160 min (or alternatively 20, 60, or 180 min from the onset of blood feeding) period prior

215 to the initiation of the cold treatment of 6 h at 2°C. Mosquitoes that did not feed during the 20  
216 min blood exposure period were used as an internal control.

### 217 *Low temperature survival*

218 To measure low temperature survival of the larvae, groups of 24 larvae were exposed to -  
219 4°C, -2°C, 0°C, 2°C, 5°C, or 10°C for 24 h using a refrigerated centrifuge as described for  
220 CCRT. Importantly, the water containing the larval mosquitoes was never observed to freeze  
221 under any of these conditions (i.e. the water supercooled). After exposure to the cold, larvae  
222 were kept at room temperature for an additional 24 h, and then survival proportion was recorded.  
223 Larvae that were able to move when disturbed were counted as alive. Chilling injury was  
224 measured as the inability to resume use of the siphon, where larvae that could not use their  
225 siphon to ventilate within 2 hours were counted as injured.

226 Chilling-survival was assessed in adult mosquitoes following 6 h exposures to temperatures  
227 between -4 and 2°C. The exposure temperatures varied somewhat between the two acclimation  
228 groups to include temperatures that result in survival proportions ranging from 0% to 100%. To  
229 this end, cold-acclimated mosquitoes were exposed to -4°C, -3°C, -2.5°C, -2°C, -1°C, 0°C, 1°C,  
230 and 2°C and warm-acclimated mosquitoes were exposed to -2°C, -1°C, -0.5°C, 0°C, 1°C, and  
231 2°C. Immediately upon removal from the cold exposure mosquitoes were isolated in 4 mL  
232 enclosed glass containers and left at room temperature ( $22 \pm 1^\circ\text{C}$ ) for 18 h to recover. Following  
233 this, the mosquitoes were assessed such that those that were able to stand were considered alive  
234 while those that were unable to stand were considered dead.

235

## 236 *Hemolymph ion concentration*

237 To quantify Na<sup>+</sup> and K<sup>+</sup> concentrations in larval hemolymph, we used the ion-selective  
238 microelectrode technique (ISME). Control larvae were sampled directly from their rearing  
239 conditions, while cold exposed larvae were first exposed to 24h at 0°C (using a refrigerated  
240 centrifuge as described for CCRT), before hemolymph was sampled and immediately measured.  
241 Hemolymph was collected by first securing larvae onto lids from 35 mm x 10 mm sterile petri  
242 dishes using Murray's® pure beeswax. Each larva was immobilized by applying beeswax to the  
243 head and terminal segment. A drop of paraffin oil was then applied to the abdomen, and the  
244 cuticle of this region was lightly sheared open with a sharp-pointed metal pin. The emerging  
245 droplet of hemolymph was collected and placed under mineral oil in a petri dish coated with a  
246 silicone elastomer using a micropipette.

247 Custom-made ion-selective microelectrodes were constructed and used following previously  
248 described methods (Jonusaite, Kelly, & Donini, 2011). Briefly, borosilicate glass capillaries were  
249 pulled to a tip diameter of ~3 µm using a micropipette puller (Flaming Brown P-97, Sutter  
250 Instruments, Novato, USA), heated to 300°C, and exposed to N,N-dimethyltrimethylsilylamine  
251 vapour for 1 h. Potassium-sensitive electrodes were backfilled with 100 mM of KCl and front-  
252 filled with K<sup>+</sup> ionophore (K<sup>+</sup> ionophore I, cocktail B, Sigma Aldrich, St. Louis, MO, USA).  
253 Sodium sensitive electrodes were backfilled with 100 mM NaCl and front-filled with Na<sup>+</sup>  
254 ionophore (Na<sup>+</sup> Ionophore II Cocktail A; Sigma Aldrich). The circuit was completed with a  
255 reference electrode pulled from filamented glass capillary and back-filled with 500 mM KCl.  
256 Signal information was relayed to a PowerLab 4/30 data acquisition device (ADInstruments;  
257 Sydney, AUS) and interpreted by LabChart 6 software (ADInstruments). Voltages obtained from

258 the hemolymph samples were compared to those from calibration solutions of known  
259 concentrations, and the Nernst slope was applied to determine hemolymph ion concentration  
260 ([X]) using the following formula:

$$261 \quad [X] = C_0 \times 10^{\frac{V-V_0}{S}} \quad (1)$$

262 Where  $C_0$  is the lower calibration concentration in mM,  $V$  is the voltage (mV) reading from the  
263 hemolymph sample,  $V_0$  is the voltage (mV) reading of the lower calibration concentration, and  $S$   
264 is the slope of the electrode (mV) which is the difference in voltage between the two calibration  
265 solutions that differ in concentration by a factor of 10. The following calibration solutions were  
266 used:  $\text{Na}^+$  (20 mM NaCl/180 mM LiCl, and 200 mM NaCl); and  $\text{K}^+$  (0.5 mM KCl/49.5 mM  
267 LiCl, 5 mM KCl/45 mM LiCl, and 50mM KCl).

## 268 *Data analysis*

269 R (version 3.6.1) was used to complete all data analyses (R Development Core Team, 2019).  
270 Larval CCO temperatures were compared between acclimation groups using a one-way ANOVA  
271 and CCRT temperatures with a generalized linear model (GLM) with exposure time and  
272 acclimation temperature as factors. Rates of injury in larval mosquitoes following the CCRT  
273 assays were compared using a two-way ANOVA with acclimation temperature and duration of  
274 cold exposure included as factors. Adult CCO and CCRT were both compared using two-way  
275 ANOVAs (with acclimation temperature and sex as factors). The effect of blood feeding on  
276 CCRT in adult mosquitoes was analyzed for each acclimation group independently (because cold  
277 acclimated mosquitoes did not feed) using GLMs. Feeding status and time since feeding were  
278 included as factors for warm acclimated mosquitoes, and only time since feeding for cold-  
279 acclimated mosquitoes. Survival following cold stress was analyzed for each life stage using

280 GLMs with a binomial error distribution and a logit-link function. Acclimation treatment and  
281 temperature were included as factors for larval survival, and sex, acclimation treatment, and  
282 temperature were included for the adults. Initial models were saturated with all potential  
283 interactions and were reduced to find the most parsimonious model based on Akaike's  
284 Information Criterion ( $\Delta AIC > 2$ ).

## 285 **Results**

### 286 *Chill coma onset*

287 Developmental acclimation did not significantly affect chill coma onset (CCO) temperatures in  
288 larval mosquitoes ( $F_{1,67} = 1.3$ ;  $P = 0.265$ ); both warm- and cold-acclimated mosquitoes had a  
289 CCO of  $\sim 6^{\circ}\text{C}$  (Fig. 1A). The majority of larvae were observed to sink to the bottom of the glass  
290 vials upon entering chill coma. Although no effect was seen in the larvae, cold acclimation  
291 strongly reduced CCO temperatures in both male and female adult mosquitoes (Fig. 1B; main  
292 effect of acclimation:  $F_{3,27} = 48.5$ ,  $P < 0.001$ ). The magnitude of this effect differed between the  
293 sexes; while the mean female CCO differed by  $\sim 3^{\circ}\text{C}$ , that of males differed by  $\sim 6.4^{\circ}\text{C}$  (Fig 1B;  
294 interaction between acclimation status and sex:  $F_{3,27} = 4.8$ ,  $P = 0.037$ ). In general, females tended  
295 to have lower CCO temperatures than males (main effect of sex:  $F_{3,27} = 6.8$ ,  $P < 0.014$ ).

296

### 297 *Chill coma recovery and injury*

298 Developmental acclimation strongly impacted chill coma recovery time (CCRT) following  
299 exposure to  $2^{\circ}\text{C}$  in larval mosquitoes. Acclimation temperature and exposure duration interacted  
300 to determine CCRT (Fig. 2A;  $F_{3,552} = 20.6$ ,  $P < 0.001$ ), such that increasing duration of cold  
301 exposure led to longer recovery times in warm-acclimated, but not cold-acclimated larval  
302 mosquitoes. In addition to increases in mean recovery times, CCRT became increasingly variable

303 in warm-acclimated mosquitoes with increasing duration of cold stress, but the same was not true  
304 in the cold-acclimated conspecifics (Fig. 2A). The proportion of larvae that could resume use of  
305 their siphon 2 h following recovery was examined in the same individuals (an index of chilling  
306 injury). Warm-acclimated larvae suffered clear chilling injury (roughly 30% after 12 or 16 h at  
307 2°C), while only slight chilling injury (~2%) was noted in the cold-acclimated larvae following  
308 the same exposures (Fig. 2B; interaction between acclimation and exposure duration:  $F_{3,20} =$   
309 10.0,  $P = 0.005$ ).

310 Cold acclimation also significantly improved rates of chill coma recovery in adult mosquitoes;  
311 Cold-acclimated mosquitoes recovered from chill coma after 6 h at 0°C approximately 25 min  
312 faster than the warm-acclimated conspecifics (Fig. 2C; main effect of acclimation:  $F_{3,112} = 38.1$ ,  
313  $P < 0.001$ ). As with CCO, females appeared more cold tolerant based on CCRT, and recovered  
314 ~10 min faster than males (on average) from the same cold stress (main effect of sex:  $F_{3,112} = 5.1$ ,  
315  $P = 0.026$ ). Unlike CCO, there was no interactive effect of sex and acclimation temperature on  
316 chill coma recovery ( $F_{3,112} = 0.01$ ,  $P = 0.796$ ), as cold acclimation improved adult CCRT by the  
317 same degree (~32-34 min) regardless of sex (Fig. 2C).

318 Warm-acclimated mosquitos were far more likely to take a blood meal when it was offered (Fig.  
319 3A;  $t = 26.3$ ,  $P < 0.001$ ); only two cold-acclimated females (out of 65 that were offered it)  
320 voluntarily fed on blood within 20 min (Fig. 3A). For cold-acclimated mosquitos that did not  
321 feed, exposure to a blood meal still impacted CCRT, as increasing time since exposure to the  
322 blood led to longer recovery times (Fig. 3B;  $F_{1,61} = 4.1$ ,  $P = 0.046$ ). For warm-acclimated  
323 mosquitos, the act of blood feeding had no effect on CCRT (Fig. 3C; main effect of feeding  
324 status:  $F_{1,61} = 0.2$ ,  $P = 0.889$ ), and although there was a slight tendency for CCRT to increase  
325 with time since the blood was offered, this effect was not statistically significant (main effect of

326 time:  $F_{1,61} = 2.8$ ,  $P = 0.100$ ), and there was no significant interactive effect of feeding status and  
327 time on CCRT (Fig. 3C;  $F_{1,61} = 0.1$ ,  $P = 0.838$ ).

328

### 329 *Low temperature survival*

330 The most parsimonious model for larval survival retained the interaction between exposure  
331 temperature and acclimation temperature, which significantly interacted to determine survival ( $z$   
332  $= 2.6$ ,  $P = 0.010$ ). Temperature strongly influenced larval survival in both acclimation groups  
333 (main effect of temperature:  $z = 9.4$ ,  $P < 0.001$ ), with larvae exposed to lower temperatures  
334 suffering higher mortality (Fig. 4A). Cold-acclimated larvae survived 24 h exposures to lower  
335 water temperatures ( $LT_{50} = -1.64 \pm 0.23^{\circ}\text{C}$ ) than their warm-acclimated conspecifics ( $LT_{50} =$   
336  $0.81 \pm 0.18^{\circ}\text{C}$ ; main effect of acclimation temperature:  $z = 7.49$ ,  $P < 0.001$ ; Fig. 4A).

337 The most parsimonious model of adult survival at low temperatures eliminated all interactions  
338 between acclimation temperature, exposure temperature, and sex, but retained all of these  
339 variables as independent effects. Adult mosquitoes exposed to lower temperatures suffered  
340 greater mortality (main effect of exposure temperature:  $z = 12.0$ ,  $P < 0.001$ ), and as was the case  
341 for both chill coma onset and chill coma recovery, adult female mosquitoes were consistently  
342 more cold-tolerant than males (Fig. 4B; main effect of sex  $z = 2.4$ ,  $P = 0.014$ ). For both sexes,  
343 cold-acclimated adults survived to lower temperatures than warm-acclimated adults (Fig. 4B;  
344 main effect of acclimation temperature:  $z=7.1$ ,  $P < 0.001$ ). Cold acclimation shifted the female  
345  $LT_{50}$  (following 6 h cold exposures) from  $0.0 \pm 0.19^{\circ}\text{C}$  to  $-1.9 \pm 0.15^{\circ}\text{C}$  and the male  $LT_{50}$  from  
346  $0.3 \pm 0.18^{\circ}\text{C}$  to  $-1.3 \pm 0.19^{\circ}\text{C}$  (Fig. 4B).

347

348



### 349 *Hemolymph ion balance*

350 Exposure to 0°C for 24 h caused both warm- and cold-acclimated larvae to lose hemolymph  
351 [Na<sup>+</sup>] balance. Both acclimation groups had similar hemolymph [Na<sup>+</sup>] prior to cold stress, and  
352 cold stress caused hemolymph [Na<sup>+</sup>] to significantly decrease in both groups (Fig. 5A; main  
353 effect of cold exposure:  $F_{3,83} = 74.1$ ,  $P < 0.001$ ). There was no main effect of acclimation  
354 treatment on [Na<sup>+</sup>] ( $F_{3,83} = 0.1$ ,  $P = 0.800$ ), nor any interaction between acclimation treatment  
355 and cold exposure ( $F_{3,83} = 0.1$ ,  $P = 0.731$ ). Cold exposure also caused both warm- and cold-  
356 acclimated larvae to lose hemolymph K<sup>+</sup> balance. Cold stress elevated hemolymph [K<sup>+</sup>] in both  
357 groups (Fig. 5B; main effect of cold exposure:  $F_{3,84} = 43.4$ ,  $P < 0.001$ ). Notably, this effect of  
358 chilling on hemolymph [K<sup>+</sup>] was more pronounced in warm-acclimated than cold-acclimated  
359 larvae (Fig. 5B; interaction between acclimation group and cold exposure:  $F_{3,84} = 6.4$ ,  $P =$   
360 0.013); 24 h at 0°C cold exposure elevated mean hemolymph [K<sup>+</sup>] in warm-acclimated  
361 mosquitos by ~130%, but only by 65% in cold-acclimated larvae (Fig. 5B). Because of this  
362 difference following cold stress (and because cold-acclimated larvae tended to have very slightly  
363 lower mean hemolymph [K<sup>+</sup>] prior to cold stress: 4.1 mM vs. 4.3 mM) there was also a  
364 significant main effect of acclimation group on hemolymph [K<sup>+</sup>] ( $F_{3,84} = 6.8$ ,  $P = 0.011$ ).

365

### 366 **Discussion**

367 Larvae and adults of *Aedes aegypti* are clearly capable of cold acclimation when presented with a  
368 change in developmental or adult acclimation temperature. In the present study we compared the  
369 effects of development or adult acclimation at only two temperatures (15°C and 25°C), but  
370 demonstrate that this difference of 10°C was sufficient to substantially alter chilling tolerance in  
371 this important vector of disease. Cold-acclimated larvae and adults more rapidly recovered from

372 chill coma following cold stress, and had significantly higher survival following chronic cold.  
373 After 12-16 h at 2°C, very few larvae acclimated to 15°C showed any signs of chilling injury  
374 while ~30% of larvae acclimated to 25°C were clearly suffering from neuromuscular injury that  
375 prevented them moving in a coordinated manner (Fig. 2B).

376 Chilling injury has been repeatedly associated with a systemic loss of ion balance in several  
377 terrestrial insects, including members of Hemiptera, Diptera, Blattodea, Lepidoptera, and  
378 Orthoptera (M. K. Andersen, Jensen, & Overgaard, 2017; V Košťál et al., 2006; Vladimír Košťál,  
379 Vambera, & Bastl, 2004; MacMillan & Sinclair, 2011b; MacMillan, Andersen, Davies, et al.,  
380 2015; MacMillan, Findsen, Pedersen, & Overgaard, 2014). Notably, however, all tests of the  
381 ionoregulatory collapse model have been previously done on terrestrial insects. Here, we  
382 demonstrate a similar inability to maintain low hemolymph  $[K^+]$  in the cold in an aquatic larval  
383 insect (Fig. 5). In several terrestrial insects, cold acclimation improves chilling tolerance and  
384 prevents hyperkalemia. In such cases, hyperkalemia is mitigated (at least in part) through  
385 modifications to renal ion and water transport that help to clear excess  $K^+$  ions from the  
386 hemolymph and maintain hemolymph volume (M. K. Andersen, Folkersen, et al., 2017;  
387 MacMillan, Andersen, Loeschcke, et al., 2015; Yerushalmi, Misyura, MacMillan, & Donini,  
388 2018). Although at present it is unclear whether the same mechanisms underlie improvements in  
389 chilling tolerance in mosquito larvae, the prevention of hyperkalemia likely attenuates cold-  
390 induced cell membrane depolarization, which would limit cell death and thereby facilitate  
391 survival (M. K. Andersen, Folkersen, et al., 2017; Bayley et al., 2018; Boutilier, 2001;  
392 MacMillan, Baatrup, et al., 2015).

393 We noted that the majority of *Aedes* larvae tend to sink upon entering chill coma. Mosquito  
394 larvae obtain gaseous oxygen from the water surface through a siphon on the posterior end of

395 their abdomen, so sinking during cold stress may limit access to oxygen during a cold stress and  
396 cause systemic hypoxia. Like cold stress, anoxia has been demonstrated to cause disruptions of  
397 ion homeostasis leading to hyperkalemia in *Drosophila* (Campbell, Andersen, Overgaard, &  
398 Harrison, 2018), meaning an inability to access sufficient oxygen during chill coma may further  
399 contribute to ionic imbalance and injury in the cold in this aquatic insect. Alternatively, as the  
400 metabolic rate of ectotherms is strongly suppressed during cold exposure, larvae may obtain  
401 sufficient oxygen from the surrounding water during cold stress to fuel metabolism and avoid the  
402 downstream consequences of hypoxia.

403 We were surprised to find that cold-acclimated adult mosquitos displayed a very strong aversion  
404 to blood feeding when the opportunity was presented (Fig. 3). As a tropical and subtropical  
405 species, *Aedes aegypti* is not known to be capable of any form of quiescence or diapause (Diniz  
406 et al., 2017), but a reduction in feeding behaviour is one of several hallmarks of insects in a  
407 period of dormancy, including mosquitos. We will not speculate on whether or not some manner  
408 of dormancy is taking place in cold-acclimated *Aedes aegypti* but argue that this subject is  
409 worthy of further investigation, particularly given the importance of this species to human health.  
410 Despite not feeding, chill coma recovery times of female mosquitos that were simply in the  
411 presence of blood increased (became worse) over the 3 h following its presentation. Most likely,  
412 this reduction in cold tolerance was driven by the warmth of the blood, which may induce rapid  
413 changes in thermal tolerance in exposed mosquitos. Drinking a blood meal induces an adaptive  
414 heat shock response in *Ae. aegypti* that protects against the effects of a rise in body temperature  
415 on fecundity (Benoit et al., 2011). We thus hypothesize that either the temperature of the warm  
416 blood or some other signal of its presence induces a similar response that alters mosquito thermal  
417 tolerance. In contrast to cold-acclimated mosquitoes, approximately half of the warm-acclimated

418 females fed on blood within 20 mins of its presentation (Fig. 3). Although we hypothesized that  
419 the salt load associated with a blood meal would alter ionoregulatory homeostasis and thereby  
420 alter chill tolerance, there was no effect of blood feeding on CCRT in warm-acclimated  
421 mosquitos. There was a tendency for the CCRT of warm-acclimated mosquitos to increase over  
422 time following presentation of the blood (as was seen in cold-acclimated adults), this trend was  
423 not statistically significant, possibly because the acclimation temperature (25°C) was closer to  
424 the temperature of the blood.

425 The adult chill coma onset temperature (CCO) of *Ae. aegypti* appears highly plastic (Fig. 1B), as  
426 cold acclimation reduced the CCO of female and male mosquitoes by approximately 6.4 and  
427 3°C, respectively. In stark contrast to adults, however, larvae acclimated to 15°C had the same  
428 CCO as those acclimated to 25°C (~6°C; Fig. 1A), despite being more tolerant of chilling by  
429 every other measure. The CCO, CCRT, and chilling injury are all thought to be related to the  
430 capacity to maintain ion and water balance, but are mediated by different specific physiological  
431 mechanisms of failure occurring in different organs and across different time scales (MacMillan,  
432 2019; Overgaard & MacMillan, 2017; Robertson et al., 2017). Our results in the present study  
433 thus suggest that acclimation alters mechanisms underlying CCRT and the development of  
434 chilling injury without impacting the temperature that causes paralysis. Further, this result  
435 suggests that for larvae, measuring the  $CT_{min}$  or CCO alone may strongly underestimate variation  
436 in cold tolerance in this species. We thus strongly recommend that other measures of cold  
437 tolerance (e.g. survival following cold stress) be included in future comparisons of thermal  
438 tolerance among or within populations, particularly in the study of larval thermal tolerance.  
439 Winter temperatures appear to be a critically important predictor of the suitability of  
440 environments for the persistence of *Ae. aegypti* and *Ae. albopictus* (Johnson et al., 2017) and

441 both species are spreading into habitats that have been previously considered too cold for their  
442 permanent establishment. Recent studies in *Drosophila* and other insects have suggested that  
443 range limits are closely associated with the frequency and severity of temperatures crossing  
444 critical physiological thresholds that mark the boundaries of activity (e.g.  $CT_{min}$ , CCO) or  
445 survival (J. L. Andersen et al., 2015; Bozinovic, Calosi, & Spicer, 2011; Calosi, Bilton, Spicer,  
446 Votier, & Atfield, 2010; Overgaard et al., 2014). Although typically considered a tropical species  
447 with little capacity for overwintering, *Ae. aegypti* appears to have a substantial thermal  
448 acclimation capacity, and this ability is at least partly associated with an improved ability to  
449 prevent cold-induced hyperkalemia. Given that acclimation can alter thermal limits, thermal  
450 plasticity is likely to be an important factor governing the ability for invasive species like *Ae.*  
451 *aegypti* to survive in new environments and respond to the effects of climate change on the mean  
452 and variance of environmental temperatures. The experimental population used in the present  
453 study is derived from strains held in a laboratory environment for decades, and acclimation  
454 capacity can vary widely in insects in the wild. Eggs of *Ae. aegypti* at the southern end of their  
455 American range appear to have evolved greater cold tolerance than populations previously  
456 studied (De Majo et al., 2017), so a careful analysis of population-level variation in thermal  
457 tolerance plasticity in *Ae. aegypti* is overdue, and would serve to inform future models of the  
458 distribution of this dangerous disease vector.

459

#### 460 **Data Accessibility**

461 All data is provided as a supplementary file for review and the same file will be uploaded to a  
462 data repository should the manuscript be accepted for publication.

463

464 **Author Contributions**

465 All authors contributed to the conception and design of the study, A.J. H.D. and G.Y. conducted  
466 the experiments. A.J., G.Y., H.D. and H.M. analyzed the data, H.M. drafted the manuscript, and  
467 all authors edited the manuscript.

468

469 **Funding**

470 This research was supported by Natural Sciences and Engineering Research Council of Canada  
471 Discovery Grants to both H.M. (grant RGPIN-2018-05322) and A.D. (grant RGPIN-2018-  
472 05841), as well as an NSERC Postgraduate Scholarship to G.Y. and a NSERC Canada Graduate  
473 Scholarship to H.D.

474

475 **References**

476 Andersen, J. L., Manenti, T., Sørensen, J. G., MacMillan, H. A., Loeschke, V., & Overgaard, J.  
477 (2015). How to assess *Drosophila* cold tolerance: chill coma temperature and lower lethal  
478 temperature are the best predictors of cold distribution limits. *Functional Ecology*, 29, 55–  
479 65. doi:10.1111/1365-2435.12310

480 Andersen, M. K., Folkersen, R., MacMillan, H. A., & Overgaard, J. (2017). Cold-acclimation  
481 improves chill tolerance in the migratory locust through preservation of ion balance and  
482 membrane potential. *The Journal of Experimental Biology*, 220, 487–496.  
483 doi:10.1242/jeb.150813

484 Andersen, M. K., Jensen, S. O., & Overgaard, J. (2017). Physiological correlates of chill  
485 susceptibility in Lepidoptera. *Journal of Insect Physiology*, 98, 317–326.  
486 doi:10.1016/j.jinsphys.2017.02.002

487 Bayley, J. S., Winther, C. B., Andersen, M. K., Grønkjær, C., Nielsen, O. B., Pedersen, T. H., &

- 488 Overgaard, J. (2018). Cold exposure causes cell death by depolarization-mediated Ca<sup>2+</sup>  
489 overload in a chill-susceptible insect. *Proceedings of the National Academy of Sciences*,  
490 201813532. doi:10.1073/pnas.1813532115
- 491 Benoit, J. B., Lopez-Martinez, G., Patrick, K. R., Phillips, Z. P., Krause, T. B., & Denlinger, D.  
492 L. (2011). Drinking a hot blood meal elicits a protective heat shock response in mosquitoes.  
493 *Proceedings of the National Academy of Sciences of the United States of America*, 108(19),  
494 8026–8029. doi:10.1073/pnas.1105195108
- 495 Bhatt, S., Gething, P. W., Brady, O. J., Messina, J. P., Farlow, A. W., Moyes, C. L., ... Hay, S. I.  
496 (2013). The global distribution and burden of dengue. *Nature*, 496(7446), 504–507.  
497 doi:10.1038/nature12060
- 498 Boutilier, R. G. (2001). Mechanisms of cell survival in hypoxia and hypothermia. *The Journal of*  
499 *Experimental Biology*, 204(Pt 18), 3171–3181.
- 500 Bozinovic, F., Calosi, P., & Spicer, J. I. (2011). Physiological correlates of geographic range in  
501 animals. *Annual Review of Ecology, Evolution, and Systematics*, 42(1), 155–179.  
502 doi:10.1146/annurev-ecolsys-102710-145055
- 503 Brady, O. J., Golding, N., Pigott, D. M., Kraemer, M. U. G., Messina, J. P., Reiner, R. C., ...  
504 Hay, S. I. (2014). Global temperature constraints on *Aedes aegypti* and *Ae. albopictus*  
505 persistence and competence for dengue virus transmission. *Parasites & Vectors*, 7, 338.
- 506 Brady, O. J., Johansson, M. A., Guerra, C. A., Bhatt, S., Golding, N., Pigott, D. M., ... Hay, S. I.  
507 (2013). Modelling adult *Aedes aegypti* and *Aedes albopictus* survival at different  
508 temperatures in laboratory and field settings. *Parasites & Vectors*, 6, 351.  
509 doi:10.1186/1756-3305-6-351
- 510 Calosi, P., Bilton, D. T., Spicer, J. I., Votier, S. C., & Atfield, A. (2010). What determines a

- 511 species' geographical range? Thermal biology and latitudinal range size relationships in  
512 European diving beetles (Coleoptera: Dytiscidae). *Journal of Animal Ecology*, 79(1), 194–  
513 204. doi:10.1111/j.1365-2656.2009.01611.x
- 514 Campbell, J. B., Andersen, M. K., Overgaard, J., & Harrison, J. F. (2018). Paralytic hypo-  
515 energetic state facilitates anoxia tolerance despite ionic imbalance in adult *Drosophila*  
516 *melanogaster*. *Journal of Experimental Biology*, 221(12). doi:10.1242/jeb.177147
- 517 Carrington, L. B., Armijos, M. V., Lambrechts, L., Barker, C. M., & Scott, T. W. (2013). Effects  
518 of fluctuating daily temperatures at critical thermal extremes on *Aedes aegypti* life-history  
519 traits. *PLoS ONE*, 8(3), e58824. doi:10.1371/journal.pone.0058824
- 520 Coello Alvarado, L. E., MacMillan, H. A., & Sinclair, B. J. (2015). Chill-tolerant *Gryllus*  
521 crickets maintain ion balance at low temperatures. *Journal of Insect Physiology*, 77, 15–25.  
522 doi:10.1016/j.jinsphys.2015.03.015
- 523 Colinet, H., & Hoffmann, A. A. (2012). Comparing phenotypic effects and molecular correlates  
524 of developmental, gradual and rapid cold acclimation responses in *Drosophila*  
525 *melanogaster*. *Functional Ecology*, 26(1), 84–93. doi:10.1111/j.1365-2435.2011.01898.x
- 526 Davis, N. C. (1931). the effects of heat and of cold upon *Aedes (Stegomyia) aegypti*. *American*  
527 *Journal of Epidemiology*, 16(1), 177–191. doi:10.1093/oxfordjournals.aje.a117854
- 528 De Majo, M. S., Montini, P., & Fischer, S. (2017). Egg hatching and survival of immature stages  
529 of *Aedes aegypti* (Diptera: Culicidae) under natural temperature conditions during the cold  
530 season in Buenos Aires, Argentina. *Journal of Medical Entomology*, 54(1), 106–113.  
531 doi:10.1093/jme/tjw131
- 532 Diniz, D. F. A., Albuquerque, C. M. R. de, Oliva, L. O., Melo-santos, M. A. V. de, & Ayres, C.  
533 F. J. (2017). Diapause and quiescence: dormancy mechanisms that contribute to the



- 534 geographical expansion of mosquitoes and their evolutionary success. *Parasites & Vectors*,  
535 10, 310. doi:10.1186/s13071-017-2235-0
- 536 Easterling, D. R., Meehl, G. A., Parmesan, C., Changnon, S. A., Karl, T. R., & Mearns, L. O.  
537 (2000). Climate extremes: Observations, modeling, and impacts. *Science*, 289(5487), 2068–  
538 2074. doi:10.1126/science.289.5487.2068
- 539 Fischer, S., Alem, I. S., De Majo, M. S., Campos, R. E., & Schweigmann, N. (2011). Cold  
540 season mortality and hatching behavior of *Aedes aegypti* L. (Diptera: Culicidae) eggs in  
541 Buenos Aires City, Argentina. *Journal of Vector Ecology*, 36(1), 94–99.  
542 doi:10.1111/j.1948-7134.2011.00145.x
- 543 Gibert, P., Moreteau, B., Pétavy, G., Karan, D., & David, J. R. (2001). Chill-coma tolerance, a  
544 major climatic adaptation among *Drosophila* species. *Evolution*, 55(5), 1063–1068.
- 545 Hanson, S. M., & Craig, G. B. J. (1995). Relationship between cold hardiness and supercooling  
546 point in *Aedes albopictus* eggs. *Journal of the American Mosquito Control Association*,  
547 11(1), 35–38.
- 548 Hawley, W. A., Pumpuni, C. B., Brady, R. H., & Craig, G. B. (1989). Overwintering survival of  
549 *Aedes albopictus* (Diptera: Culicidae) eggs in Indiana. *Journal of Medical Entomology*, 26,  
550 122–129.
- 551 Hoffmann, A. A., Scott, M., Partridge, L., & Hallas, R. (2003). Overwintering in *Drosophila*  
552 *melanogaster*: outdoor field cage experiments on clinal and laboratory selected populations  
553 help to elucidate traits under selection. *Journal of Evolutionary Biology*, 16, 614–623.
- 554 Johnson, T. L., Haque, U., Monaghan, A. J., Eisen, L., Hahn, M. B., Hayden, M. H., ... Eisen, R.  
555 J. (2017). Modeling the environmental suitability for *Aedes (Stegomyia) aegypti* and *Aedes*  
556 (*Stegomyia) albopictus* (Diptera: Culicidae) in the contiguous United States. *Journal of*

- 557 *Medical Entomology*, 54(6), 1605–1614. doi:10.1093/jme/tjx163
- 558 Jonusaite, S., Kelly, S. P., & Donini, A. (2011). The physiological response of larval  
559 *Chironomus riparius* (Meigen) to abrupt brackish water exposure. *Journal of Comparative*  
560 *Physiology B*, 181(3), 343–352. doi:10.1007/s00360-010-0526-2
- 561 Kamal, M., Kenawy, M. A., Rady, M. H., Khaled, A. S., & Samy, A. M. (2018). Mapping the  
562 global potential distributions of two arboviral vectors *Aedes aegypti* and *Ae. Albopictus*  
563 under changing climate. *PLoS ONE*, 13(12), 1–21. doi:10.1371/journal.pone.0210122
- 564 Kellermann, V., Loeschcke, V., Hoffmann, A. A., Kristensen, T. N., Fløjgaard, C., David, J. R.,  
565 ... Overgaard, J. (2012). Phylogenetic constraints in key functional traits behind species'  
566 climate niches: patterns of desiccation and cold resistance across 95 *Drosophila* species.  
567 *Evolution*, 66(11), 3377–3389. doi:10.1111/j.1558-5646.2012.01685.x
- 568 Kelty, J. D., & Lee, R. E. J. (2001). Rapid cold-hardening of *Drosophila melanogaster* (Diptera:  
569 Drosophilidae) during ecologically based thermoperiodic cycles. *Journal of Experimental*  
570 *Biology*, 204, 1659–1666.
- 571 Košťál, V., Yanagimoto, M., & Bastl, J. (2006). Chilling-injury and disturbance of ion  
572 homeostasis in the coxal muscle of the tropical cockroach (*Nauphoeta cinerea*).  
573 *Comparative Biochemistry and Physiology Part B, Biochemistry and Molecular Biology*,  
574 143, 171–179. doi:10.1016/j.cbpb.2005.11.005
- 575 Košťál, Vladimír, Vambera, J., & Bastl, J. (2004). On the nature of pre-freeze mortality in  
576 insects: water balance, ion homeostasis and energy charge in the adults of *Pyrrhocoris*  
577 *apterus*. *The Journal of Experimental Biology*, 207(9), 1509–1521. doi:10.1242/jeb.00923
- 578 Kraemer, M. U. G., Reiner, R. C., Brady, O. J., Messina, J. P., Gilbert, M., Pigott, D. M., ...  
579 Golding, N. (2019). Past and future spread of the arbovirus vectors *Aedes aegypti* and *Aedes*

- 580 *albopictus*. *Nature Microbiology*, 4(5), 854–863. doi:10.1038/s41564-019-0376-y
- 581 Kraemer, M. U. G., Sinka, M. E., Duda, K. A., Mylne, A. Q. N., Shearer, F. M., Barker, C. M.,  
582 ... Hay, S. I. (2015). The global distribution of the arbovirus vectors *Aedes aegypti* and *Ae.*  
583 *albopictus*. *ELife*, 4, e08347. doi:10.7554/eLife.08347
- 584 Lima, A., Lovin, D. D., Hickner, P. V., & Severson, D. W. (2016). Evidence for an overwintering  
585 population of *Aedes aegypti* in Capitol Hill neighborhood, Washington, DC. *American*  
586 *Journal of Tropical Medicine and Hygiene*, 94(1), 231–235. doi:10.4269/ajtmh.15-0351
- 587 MacLean, H. J., Sørensen, J. G., Kristensen, T. N., Loeschcke, V., Beedholm, K., Kellermann,  
588 V., & Overgaard, J. (2019). Evolution and plasticity of thermal performance: An analysis of  
589 variation in thermal tolerance and fitness in 22 *Drosophila* species. *Philosophical*  
590 *Transactions of The Royal Society B Biological Sciences*, 374, 20180548.  
591 doi:10.1098/rstb.2018.0548.R1
- 592 MacMillan, H. A. (2019). Dissecting cause from consequence: a systematic approach to thermal  
593 limits. *The Journal of Experimental Biology*, 222, jeb191593. doi:10.1242/jeb.191593
- 594 MacMillan, H. A., & Sinclair, B. J. (2011a). Mechanisms underlying insect chill-coma. *Journal*  
595 *of Insect Physiology*, 57(1), 12–20. doi:10.1016/j.jinsphys.2010.10.004
- 596 MacMillan, H. A., & Sinclair, B. J. (2011b). The role of the gut in insect chilling injury: cold-  
597 induced disruption of osmoregulation in the fall field cricket, *Gryllus pennsylvanicus*. *The*  
598 *Journal of Experimental Biology*, 214(Pt 5), 726–734. doi:10.1242/jeb.051540
- 599 MacMillan, H.A., Andersen, J. L., Davies, S. A., & Overgaard, J. (2015). The capacity to  
600 maintain ion and water homeostasis underlies interspecific variation in *Drosophila* cold  
601 tolerance. *Scientific Reports*, 5, 18607. doi:10.1038/srep18607
- 602 MacMillan, H.A., Andersen, J. L., Loeschcke, V., & Overgaard, J. (2015). Sodium distribution

603 predicts the chill tolerance of *Drosophila melanogaster* raised in different thermal  
604 conditions. *American Journal of Physiology. Regulatory, Integrative and Comparative*  
605 *Physiology*, 308, 823–831. doi:10.1152/ajpregu.00465.2014

606 MacMillan, H.A., Baatrup, E., & Overgaard, J. (2015). Concurrent effects of cold and  
607 hyperkalaemia cause insect chilling injury. *Proceedings of the Royal Society B: Biological*  
608 *Sciences*, 282(1817), 20151483. doi:10.1098/rspb.2015.1483

609 MacMillan, H.A., Finsen, A., Pedersen, T. H., & Overgaard, J. (2014). Cold-induced  
610 depolarization of insect muscle: differing roles of extracellular K<sup>+</sup> during acute and chronic  
611 chilling. *The Journal of Experimental Biology*, 217, 2930–2938. doi:10.1242/jeb.107516

612 Mellanby, K. (1939). Low temperature and insect activity. *Proceedings of the Royal Society of*  
613 *London Series B*, 127, 473–487.

614 Mosquito responsible for majority of zika infections found in Canada for the first time. (2017).  
615 Retrieved from [http://www.cbc.ca/news/canada/windsor/mosquito-responsible-for-majority-](http://www.cbc.ca/news/canada/windsor/mosquito-responsible-for-majority-of-zika-infections-found-in-canada-for-first-time-1.4257135)  
616 [of-zika-infections-found-in-canada-for-first-time-1.4257135](http://www.cbc.ca/news/canada/windsor/mosquito-responsible-for-majority-of-zika-infections-found-in-canada-for-first-time-1.4257135)

617 Nyamukondiwa, C., Terblanche, J. S., Marshall, K. E., & Sinclair, B. J. (2011). Basal cold but  
618 not heat tolerance constrains plasticity among *Drosophila* species (Diptera: Drosophilidae).  
619 *Journal of Evolutionary Biology*, 24(9), 1927–1938. doi:10.1111/j.1420-9101.2011.02324.x

620 Overgaard, J., Kearney, M. R., & Hoffmann, A. A. (2014). Sensitivity to thermal extremes in  
621 Australian *Drosophila* implies similar impacts of climate change on the distribution of  
622 widespread and tropical species. *Global Change Biology*, 20, 1738–1750.  
623 doi:10.1111/gcb.12521

624 Overgaard, J., & MacMillan, H. A. (2017). The integrative physiology of insect chill tolerance.  
625 *Annual Review of Physiology*, 79(1), 187–208. doi:10.1146/annurev-physiol-022516-

- 626 034142
- 627 R Development Core Team. (2019). R: A language and environment for statistical computing. *R*  
628 *Foundation for Statistical Computing*, <http://www.r-project.org>.
- 629 Ransberry, V. E., MacMillan, H. A., & Sinclair, B. J. (2011). The relationship between chill-  
630 coma onset and recovery at the extremes of the thermal window of *Drosophila*  
631 *melanogaster*. *Physiological and Biochemical Zoology*, 84(6), 553–559.  
632 doi:10.1086/662642
- 633 Robertson, R. M., Spong, K. E., & Srithiphaphirom, P. (2017). Chill coma in the locust, *Locusta*  
634 *migratoria*, is initiated by spreading depolarization in the central nervous system. *Scientific*  
635 *Reports*, 7, 10297. doi:10.1038/s41598-017-10586-6
- 636 Rochlin, I., Ninivaggi, D. V., Hutchinson, M. L., & Farajollahi, A. (2013). Climate change and  
637 range expansion of the Asian Tiger Mosquito (*Aedes albopictus*) in Northeastern USA:  
638 Implications for public health practitioners. *PLoS ONE*, 8(4), e60874.  
639 doi:10.1371/journal.pone.0060874
- 640 Romi, R., Severlini, F., & Toma, L. (2006). Cold acclimation and overwintering of female *Aedes*  
641 *albopictus* in Roma. *Journal of the American Mosquito Control Association*, 22(1), 149–  
642 151. doi:10.2987/8756-971x(2006)22[149:caaoof]2.0.co;2
- 643 Rueda, L., Patel, K., Axtell, R., & Stinner, R. (1990). Temperature-dependent development and  
644 survival rates of *Culex quinquefasciatus* and *Aedes aegypti* (Diptera: Culicidae). *Journal of*  
645 *Medical Entomology*, 27(5), 892–898. doi:10.1093/jmedent/27.5.892
- 646 Sinclair, B. J., Terblanche, J. S., Scott, M. B., Blatch, G. L., Jaco Klok, C., & Chown, S. L.  
647 (2006). Environmental physiology of three species of Collembola at Cape Hallett, North  
648 Victoria Land, Antarctica. *Journal of Insect Physiology*, 52(1), 29–50.

- 649       doi:10.1016/j.jinsphys.2005.09.002
- 650       Sørensen, J. G., Kristensen, T. N., & Overgaard, J. (2016). Evolutionary and ecological patterns  
651       of thermal acclimation capacity in *Drosophila*: is it important for keeping up with climate  
652       change? *Current Opinion in Insect Science*, *17*, 98–104. doi:10.1016/j.cois.2016.08.003
- 653       Teets, N. M., & Denlinger, D. L. (2013). Physiological mechanisms of seasonal and rapid cold-  
654       hardening in insects. *Physiological Entomology*, *38*(2), 105–116. doi:10.1111/phen.12019
- 655       Thomas, S. M., Obermayr, U., Fischer, D., Kreyling, J., & Beierkuhnlein, C. (2012). Low-  
656       temperature threshold for egg survival of a post-diapause and non-diapause European  
657       aedine strain, *Aedes albopictus* (Diptera: Culicidae). *Parasites and Vectors*, *5*(1), 100.  
658       doi:10.1186/1756-3305-5-100
- 659       Tun-Lin, W., Burkot, T. R., & Kay, B. H. (2000). Effects of temperature and larval diet on  
660       development rates and survival of the dengue vector *Aedes aegypti* in north Queensland,  
661       Australia. *Medical and Veterinary Entomology*, *14*(1), 31–37. doi:10.1046/j.1365-  
662       2915.2000.00207.x
- 663       Vorhees, A. S., Gray, E. M., & Bradley, T. J. (2013). Thermal resistance and performance  
664       correlate with climate in populations of a widespread mosquito. *Physiological and*  
665       *Biochemical Zoology*, *86*(1), 73–81. doi:10.1086/668851
- 666       Warren, R. J., & Chick, L. (2013). Upward ant distribution shift corresponds with minimum, not  
667       maximum, temperature tolerance. *Global Change Biology*, *19*, 2082–2088.  
668       doi:10.1111/gcb.12169
- 669       Williams, C. M., Henry, H. A. L., & Sinclair, B. J. (2014). Cold truths: how winter drives  
670       responses of terrestrial organisms to climate change. *Biological Reviews of the Cambridge*  
671       *Philosophical Society*, *90*, 214–235. doi:10.1111/brv.12105

- 672 Yang, H. M., Macoris, M. L. G., Galvani, K. C., Andrighetti, M. T. M., & Wanderly, D. M. V.  
673 (2009). Assessing the effects of temperature on the population of *Aedes aegypti*, the vector  
674 of dengue. *Epidemiology and Infection*, 137(8), 1188–1202.  
675 doi:10.1017/s0950268809002040
- 676 Yerushalmi, G. Y., Misyura, L., MacMillan, H. A., & Donini, A. (2018). Functional plasticity of  
677 the gut and the Malpighian tubules underlies cold acclimation and mitigates cold-induced  
678 hyperkalemia in *Drosophila melanogaster*. *The Journal of Experimental Biology*, 221,  
679 jeb.174904. doi:10.1242/jeb.174904
- 680

681 **Figures**

682

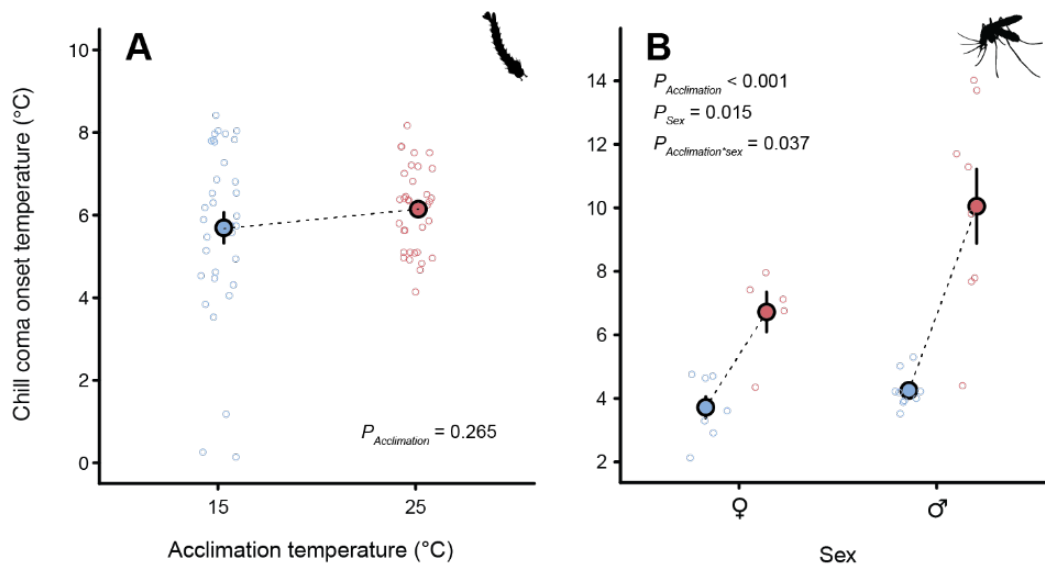

683

684

685 **Figure 1:** Chill coma onset temperatures of larval (A) and adult (B) *Aedes aegypti* acclimated to  
686 warm (25°C; red) and cool (15°C; blue) conditions. Open circles represent individual mosquitoes  
687 and closed circles represent the mean ( $\pm$  sem) for each acclimation group and life stage. Error  
688 bars that are not visible are obscured by the symbols.



689  
690  
691  
692  
693  
694  
695  
696

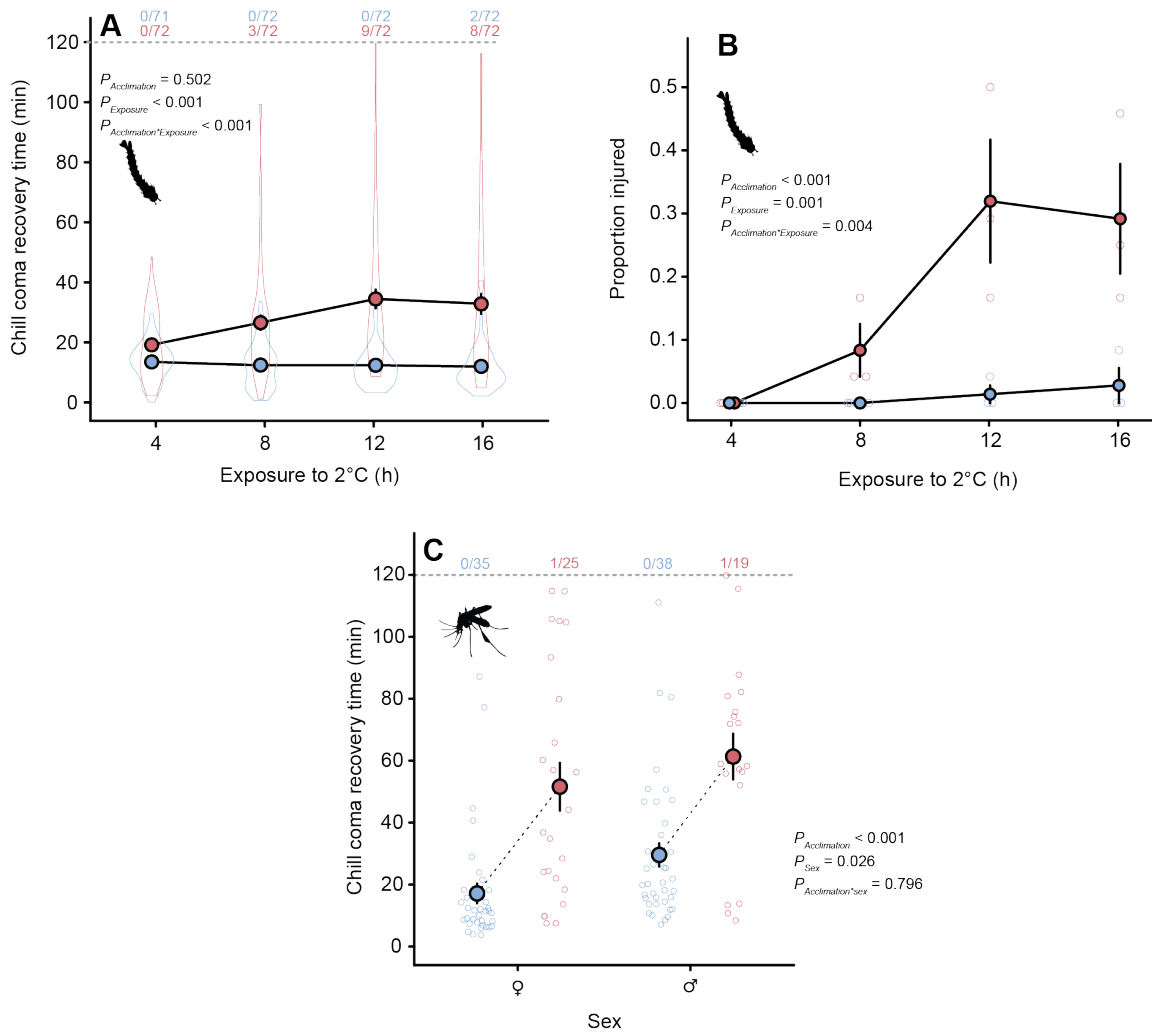

697  
698  
699  
700  
701  
702  
703  
704  
705  
706  
707  
708

**Figure 2:** Chill coma recovery times (CCRT) of larval (A) and adult (B) warm- (25°C) and cold (15°C) *Aedes aegypti*. Larvae were exposed to 2°C for one of four different durations (x-axis) and adult CCRT was recorded following 6 h at 2°C. Violin plots in panel A represent sample distributions (owing to large sample size). Open circles in panel B represent proportion of mosquitoes injured (unable to resume siphon use within 2 h) in three independent trials. Open circles in panel C represent individual adult mosquitoes. Ratios above the dashed lines in panels A and C represent the number of individuals that did not recover from chill coma within the observation period (120 min). In all panels closed circles represent the mean ( $\pm$  sem) of each group. Error bars that are not visible are obscured by the symbols.

709  
710  
711  
712  
713

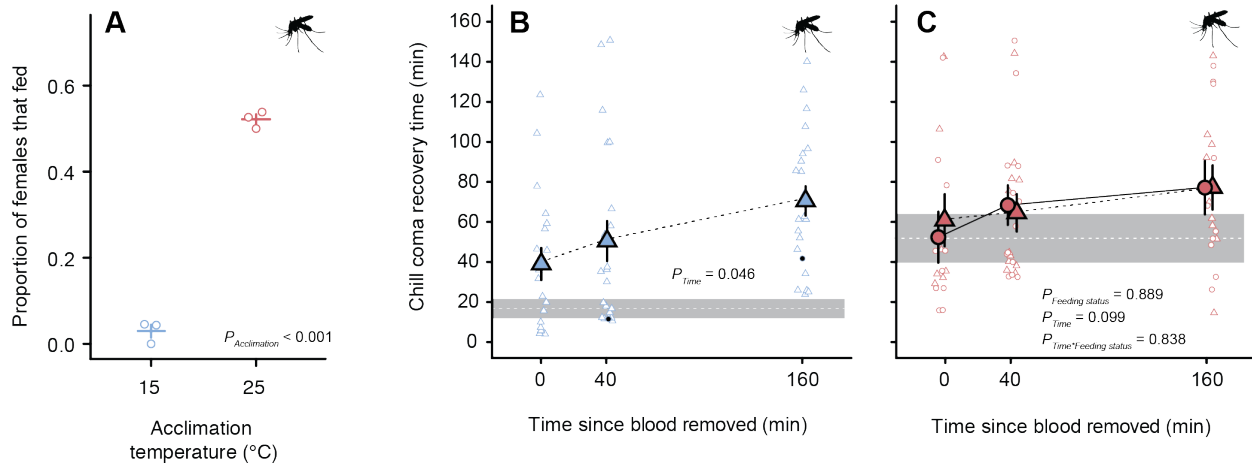

714  
715  
716  
717  
718  
719  
720  
721  
722  
723  
724  
725  
726  
727

**Figure 3:** Rates of blood feeding (A) and chill coma recovery times following blood feeding of cold- (B; 15°C; blue) and warm-acclimated (C; 25°C, red) adult *Aedes aegypti* females. Mosquitoes of both acclimation groups were offered warm sheep's blood for 20 min before the blood was removed. Individual mosquitoes were then given 0 min or an additional 40 or 160 min at room temperature before they were exposed to 0°C for 6 h. Triangles represent mosquitoes that chose not to feed on the blood while circles represent those that did feed. Open circles in panel A represent the proportion of mosquitoes that fed within each treatment group. Open symbols in panels B and C represent CCRT values of individual adult mosquitoes. The two closed circles in panel B represent the two cold-acclimated mosquitoes that took a bloodmeal (see Results text). In all cases, closed blue and red symbols represent the mean ( $\pm$  sem). Error bars that are not visible are obscured by the symbols.

728  
729  
730  
731

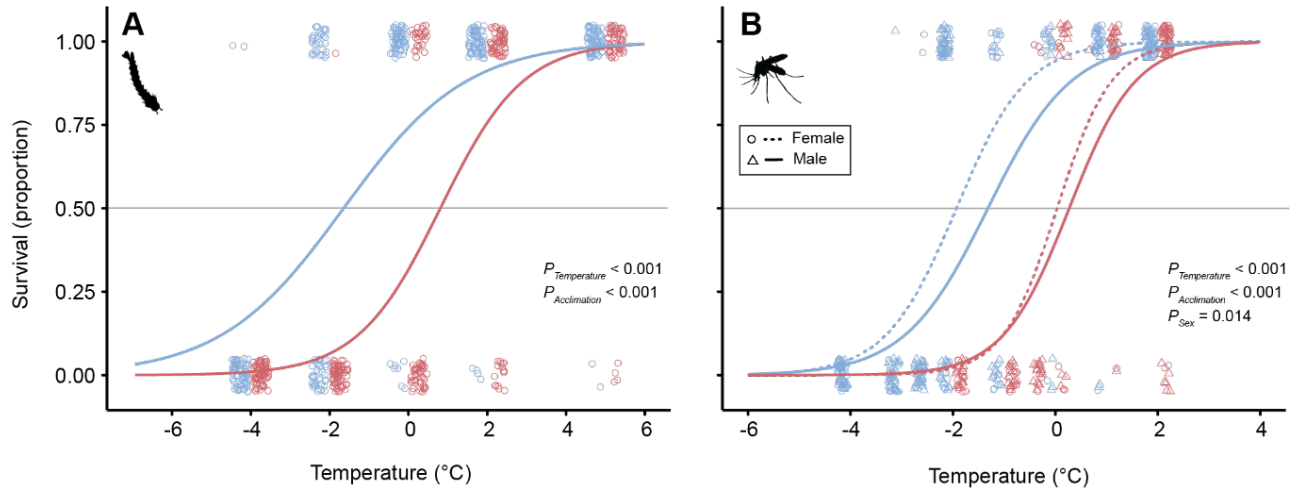

732  
733  
734  
735  
736  
737  
738  
739

**Figure 4:** Rates of survival following cold exposure in larval (A) and adult (B) warm- (25°C; red) and cold-acclimated (15°C; blue) *Aedes aegypti*. Open symbols represent individual mosquitoes and are slightly shifted (both vertically and horizontally) for visual clarity. Lines represent models of best fit. Larvae were exposed to treatment temperatures for 24 h and adults for 6 h.

740  
741

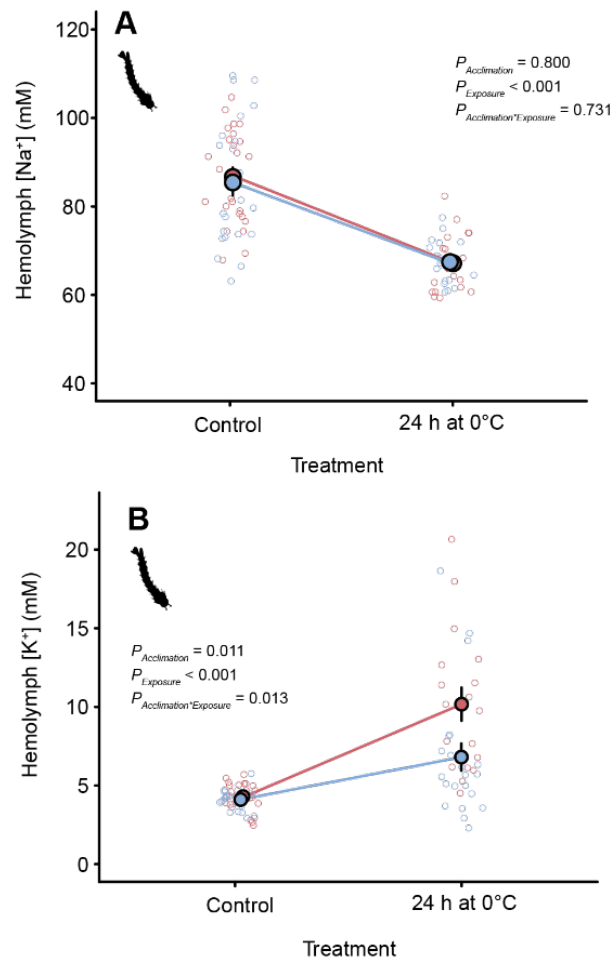

742  
743  
744  
745  
746

**Figure 5:** Concentrations of Na<sup>+</sup> (A) and K<sup>+</sup> (B) before and after cold stress in larval *Aedes aegypti*. Open circles represent individual samples and closed circles represent the mean (± sem). Error bars that are not visible are obscured by the symbols.

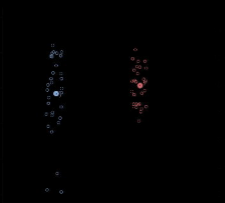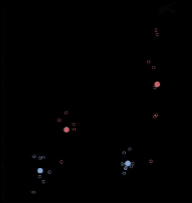

Temperature (C) vs. Number of species

Temperature (C) vs. Number of species

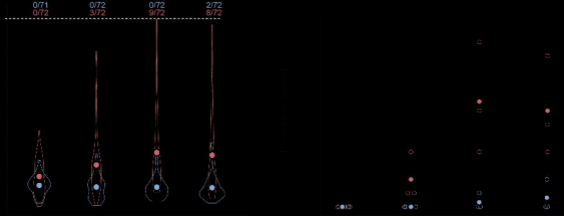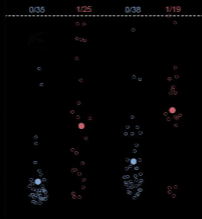

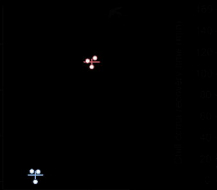

Animation  
frame 0

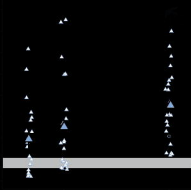

Time step 0.00 removed from

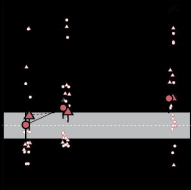

Time step 0.00 removed from

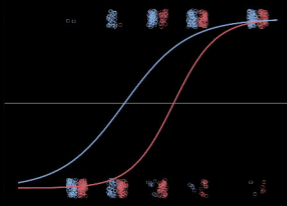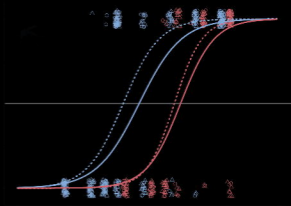



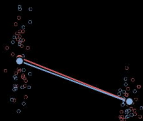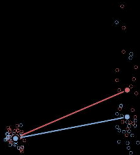

Source: https://www.biorxiv.org/content/10.1101/745885v1.full.pdf
